# Supplementary material for: Nitrogen and boron coordinated single-atom catalysts for low-temperature CO/NO oxidations
Source: Royal Society of Chemistry journal article supplement (doi:10.1039/d1ta03099j), 2021-01-01
Supplement: d1ta03099j1.pdf [file d1ta03099j1.pdf]

**Supporting information for**

**Nitrogen and Boron coordinated single-atom catalysts for Low-  
temperature CO/NO oxidations**

Yanan Tang<sup>a\*</sup>, Weiguang Chen<sup>a</sup>, Jinlei Shi<sup>a</sup>, Zhiwen Wang<sup>a</sup>, Yingqi Cui<sup>a</sup>, Da Teng<sup>a</sup>, Yi  
Li<sup>b</sup>, Zhen Feng<sup>b</sup> and Xianqi Dai<sup>b\*</sup>

<sup>a</sup> College of physics and Electronic Engineering, Zhengzhou Normal University,  
Zhengzhou 450044, China

<sup>b</sup> School of Physics, Henan Normal University, Xinxiang, Henan 453007, China

\*Corresponding author. E-mail address: [yntang2010@163.com](mailto:yntang2010@163.com) (Y. Tang), [xqdai@htu.cn](mailto:xqdai@htu.cn) (X. Dai).

**Table S1.** The adsorption heights ( $d_1$ , Å), bond distance ( $d_2$ , Å), amount of transfer charge between metal Co atoms and reactive gas species ( $\Delta q_1/\Delta q_2$ , e).

| Substrates                            | Gas reactants                          |                                        |                                        |                                   |                                        |                                        |
|---------------------------------------|----------------------------------------|----------------------------------------|----------------------------------------|-----------------------------------|----------------------------------------|----------------------------------------|
|                                       | CO                                     | NO                                     | O <sub>2</sub>                         | O                                 | CO <sub>2</sub>                        | NO <sub>2</sub>                        |
|                                       | $d_1, d_2$<br>$\Delta q_1, \Delta q_2$ | $d_1, d_2$<br>$\Delta q_1, \Delta q_2$ | $d_1, d_2$<br>$\Delta q_1, \Delta q_2$ | $d_1$<br>$\Delta q_1, \Delta q_2$ | $d_1, d_2$<br>$\Delta q_1, \Delta q_2$ | $d_1, d_2$<br>$\Delta q_1, \Delta q_2$ |
| B <sub>1</sub> -gra-Co                | 1.87, 1.15                             | 1.71, 1.18                             | 1.88, 1.37                             | 1.63                              | 2.01, 1.18                             | 1.81, 1.40                             |
|                                       | 0.57, 0.19                             | 0.68, 0.36                             | 0.78, 0.66                             | 0.82, 0.71                        | 0.56, 0.03                             | 0.70, 0.65                             |
| B <sub>2</sub> -gra-Co                | 1.82, 1.15                             | 1.67, 1.18                             | 1.88, 1.36                             | 1.63                              | 2.00, 1.18                             | 1.78, 1.37                             |
|                                       | 0.34, 0.21                             | 0.46, 0.31                             | 0.58, 0.62                             | 0.60, 0.70                        | 0.27, 0.02                             | 0.51, 0.64                             |
| B <sub>3</sub> -gra-Co                | 1.82, 1.15                             | 1.67, 1.17                             | 1.85, 1.37                             | 1.64                              | 1.97, 1.18                             | 1.83, 1.37                             |
|                                       | 0.17, 0.19                             | 0.28, 0.27                             | 0.48, 0.63                             | 0.47, 0.65                        | 0.14, 0.02                             | 0.29, 0.61                             |
| N <sub>1</sub> -gra-Co                | 1.87, 1.16                             | 1.72, 1.20                             | 1.80, 1.37                             | 1.60                              | 2.27, 1.18                             | 1.79, 1.39                             |
|                                       | 0.89, 0.24                             | 0.97, 0.46                             | 1.12, 0.75                             | 1.12, 0.73                        | 0.92, 0.03                             | 1.08, 0.60                             |
| N <sub>2</sub> -gra-Co                | 1.82, 1.17                             | 1.65, 1.20                             | 1.80, 1.39                             | 1.61                              | 2.22, 1.18                             | 1.80, 1.39                             |
|                                       | 0.99, 0.31                             | 1.03, 0.45                             | 1.19, 0.77                             | 1.19, 0.72                        | 0.97, 0.05                             | 1.14, 0.63                             |
| N <sub>3</sub> -gra-Co                | 1.77, 1.17                             | 1.64, 1.20                             | 1.82, 1.38                             | 1.62                              | 2.04, 1.19                             | 1.84, 1.38                             |
|                                       | 1.01, 0.38                             | 1.09, 0.48                             | 1.25, 0.71                             | 1.25, 0.72                        | 1.04, 0.07                             | 1.23, 0.70                             |
| B <sub>1</sub> N <sub>1</sub> -gra-Co | 1.82, 1.16                             | 1.65, 1.19                             | 1.80, 1.37                             | 1.62                              | 2.16, 1.18                             | 1.77, 1.39                             |
|                                       | 0.63, 0.28                             | 0.74, 0.41                             | 0.82, 0.67                             | 0.86, 0.71                        | 0.61, 0.03                             | 0.77, 0.61                             |
| B <sub>1</sub> N <sub>2</sub> -gra-Co | 1.71, 1.17                             | 1.64, 1.19                             | 1.82, 1.38                             | 1.61                              | 2.12, 1.18                             | 1.77, 1.41                             |
|                                       | 0.64, 0.37                             | 0.77, 0.42                             | 0.83, 0.71                             | 0.93, 0.74                        | 0.70, 0.04                             | 0.84, 0.61                             |
| B <sub>2</sub> N <sub>1</sub> -gra-Co | 1.73, 1.16                             | 1.66, 1.19                             | 1.78, 1.37                             | 1.62                              | 2.01, 1.18                             | 1.95, 1.31                             |
|                                       | 0.32, 0.24                             | 0.56, 0.40                             | 0.66, 0.67                             | 0.61, 0.70                        | 0.35, 0.02                             | 0.56, 0.62                             |
| SV-gra-Co                             | 1.88, 1.16                             | 1.74, 1.20                             | 1.90, 1.37                             | 1.61                              | 2.19, 1.18                             | 1.78, 1.40                             |
|                                       | 0.83, 0.21                             | 0.93, 0.45                             | 1.04, 0.68                             | 1.06, 0.74                        | 0.86, 0.03                             | 1.01, 0.63                             |

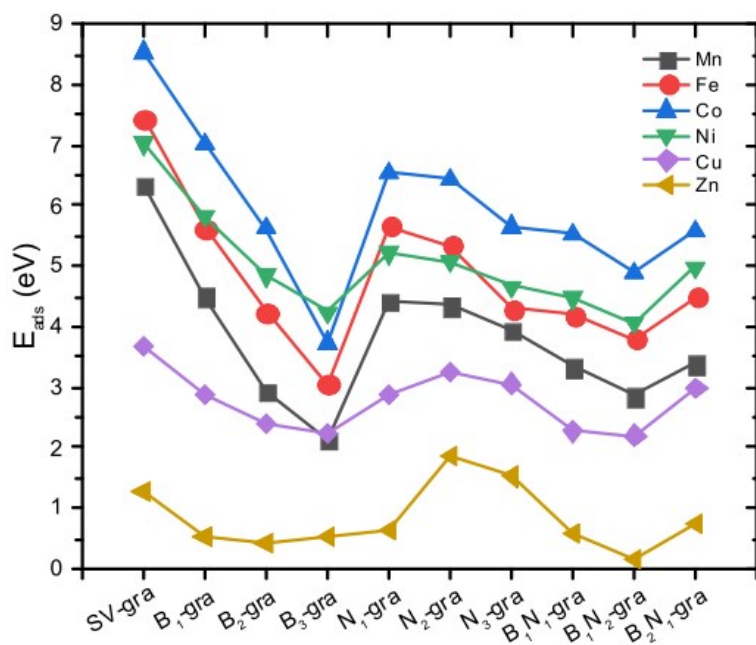

**Fig.S1.** The adsorption stability for transition metal atoms (M=Mn, Fe, Co, Ni, Cu and Zn) anchored B<sub>x</sub>N<sub>y</sub>-graphene sheets.

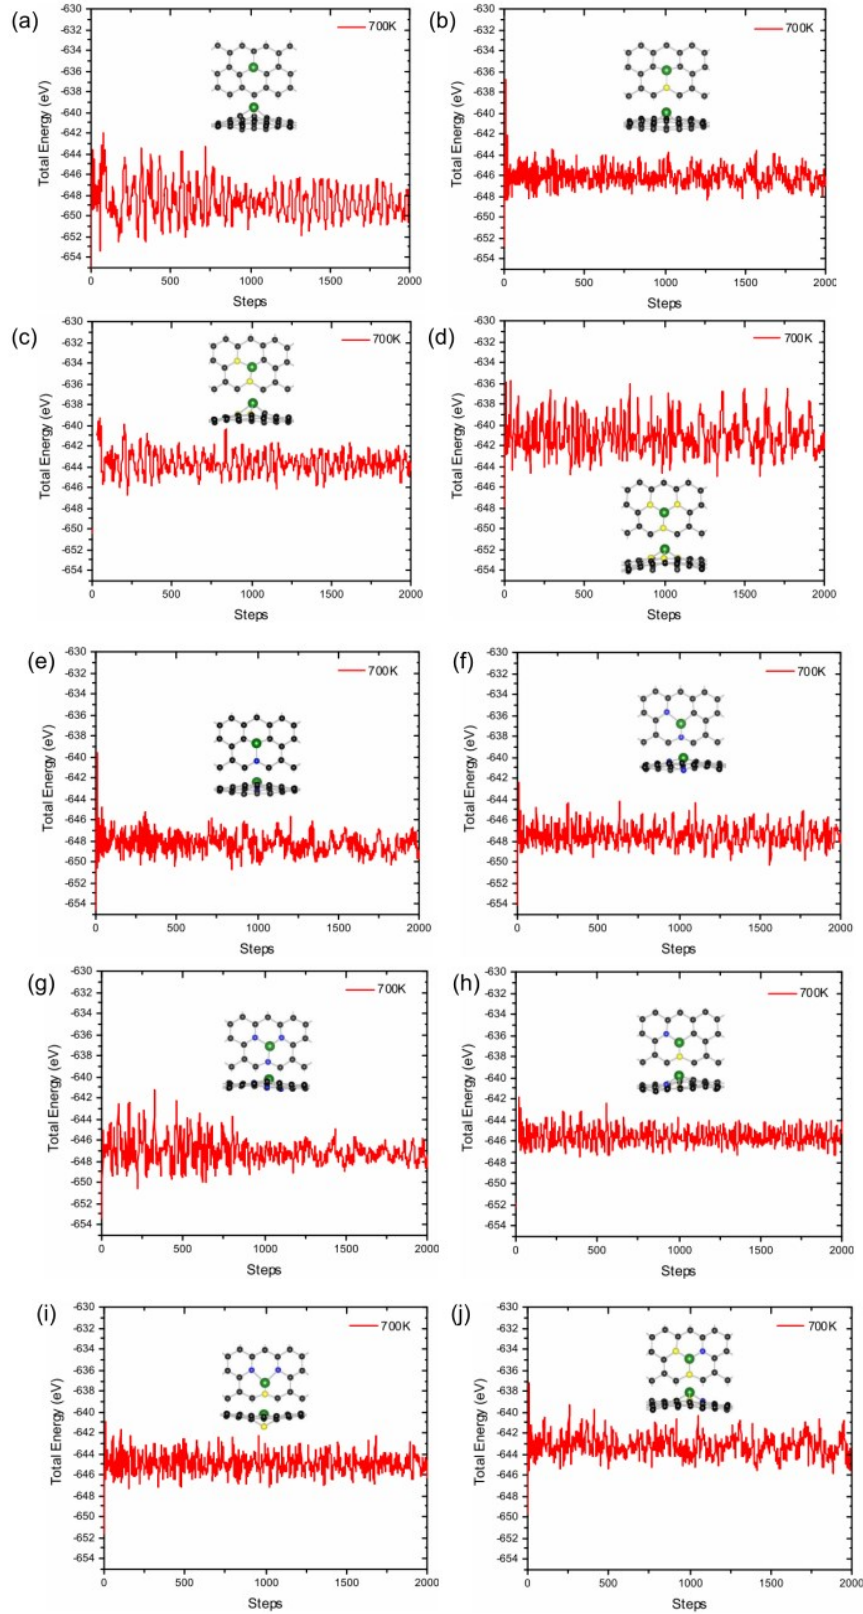

**Fig.S2.** The formation of (a) SV-graphene-Co and (b)-(j) B<sub>x</sub>N<sub>y</sub>-graphene-Co configurations from the molecular dynamics simulation at 700 K.

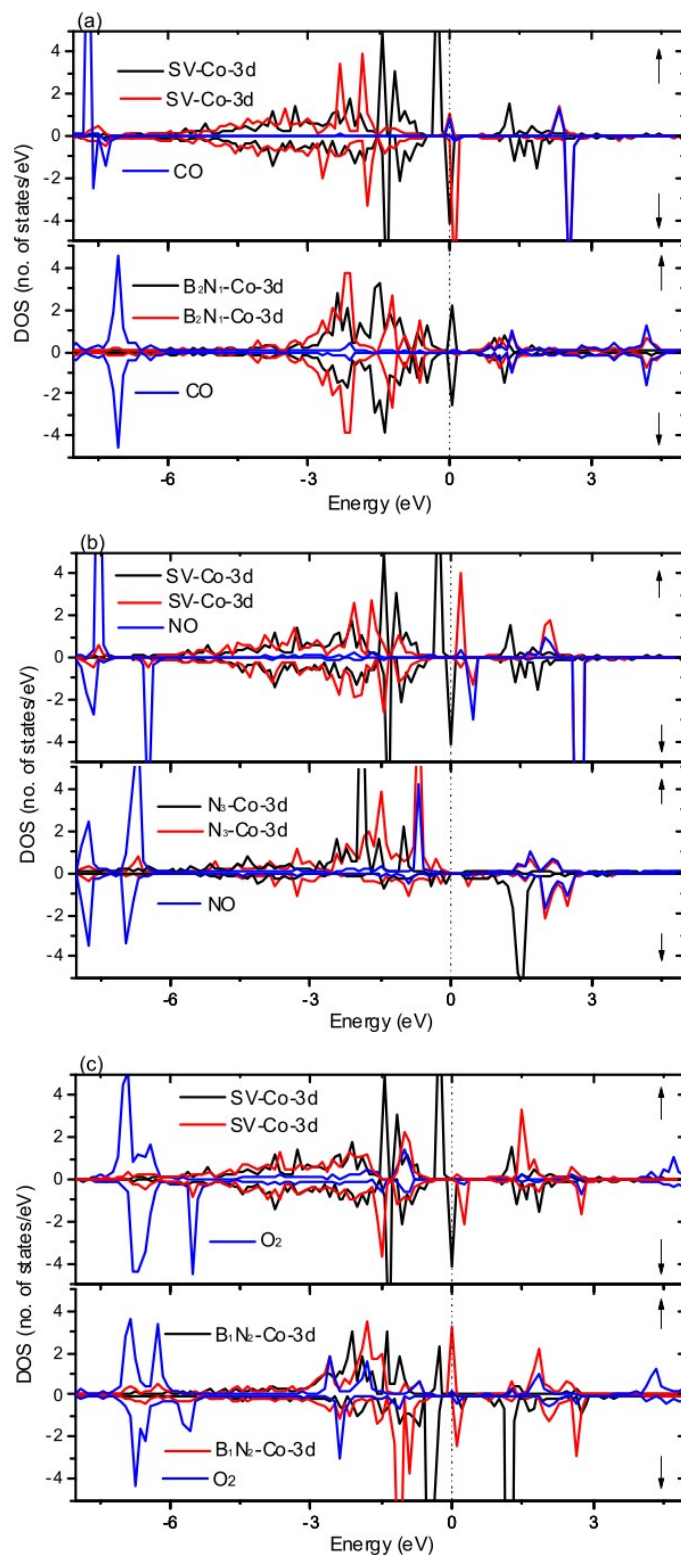

**Fig.S3.** The DOS plots for (a) CO, (b) NO and (c) O<sub>2</sub> adsorbed SV-graphene-Co and B<sub>x</sub>N<sub>y</sub>-graphene-Co sheets, the black, red and blue curves represent the PDOS of Co-3d orbitals without (or with) gas adsorption and the LDOS of adsorbed gases.

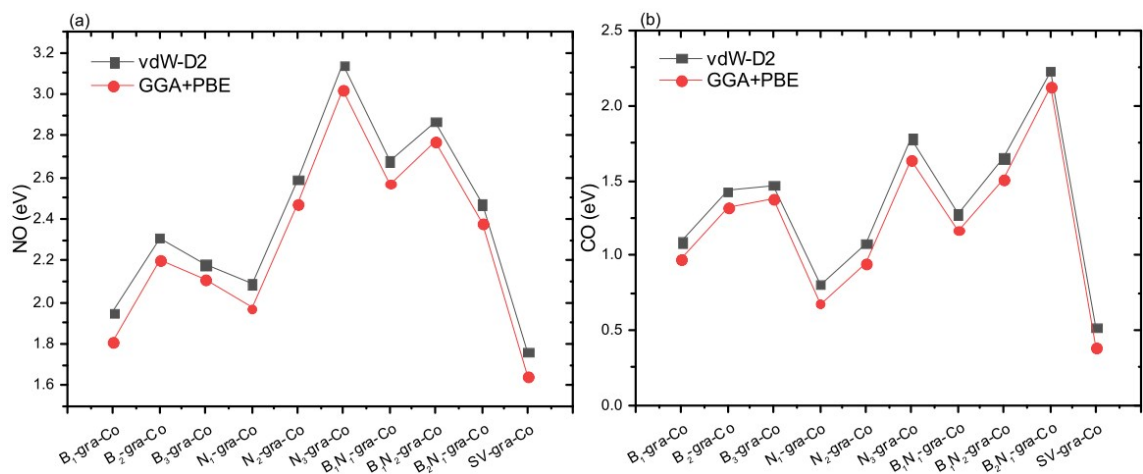

**Fig.S4.** The trend of adsorption stability for (a) NO and (b) CO on different graphene substrates by the GGA + PBE and vdW-D2 calculations.

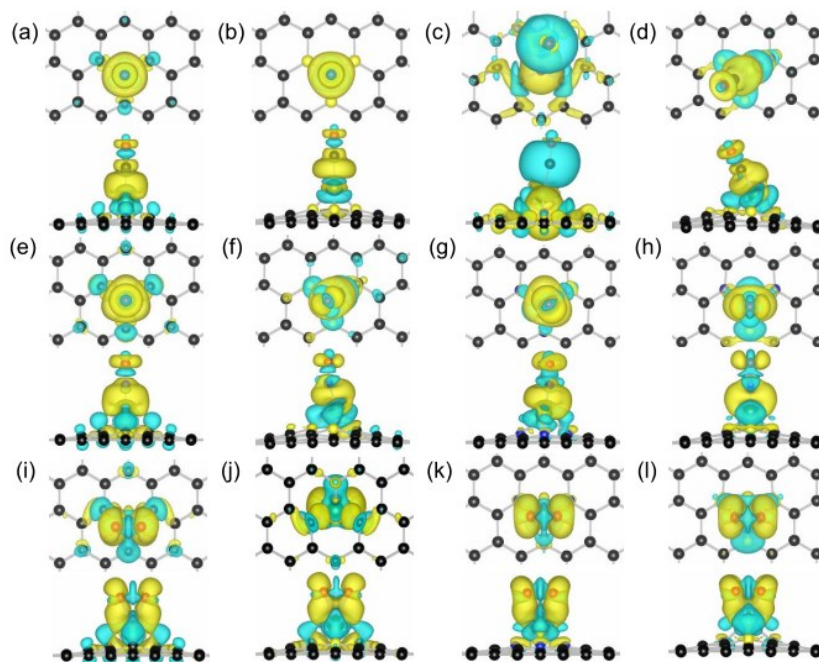

**Fig.S5.** Charge density difference plots for (a)-(d) CO, (e)-(h) NO and (i)-(l) O<sub>2</sub> on B<sub>x</sub>N<sub>y</sub>-graphene-Co systems. The isosurface value is 0.002 e/bohr<sup>3</sup>.

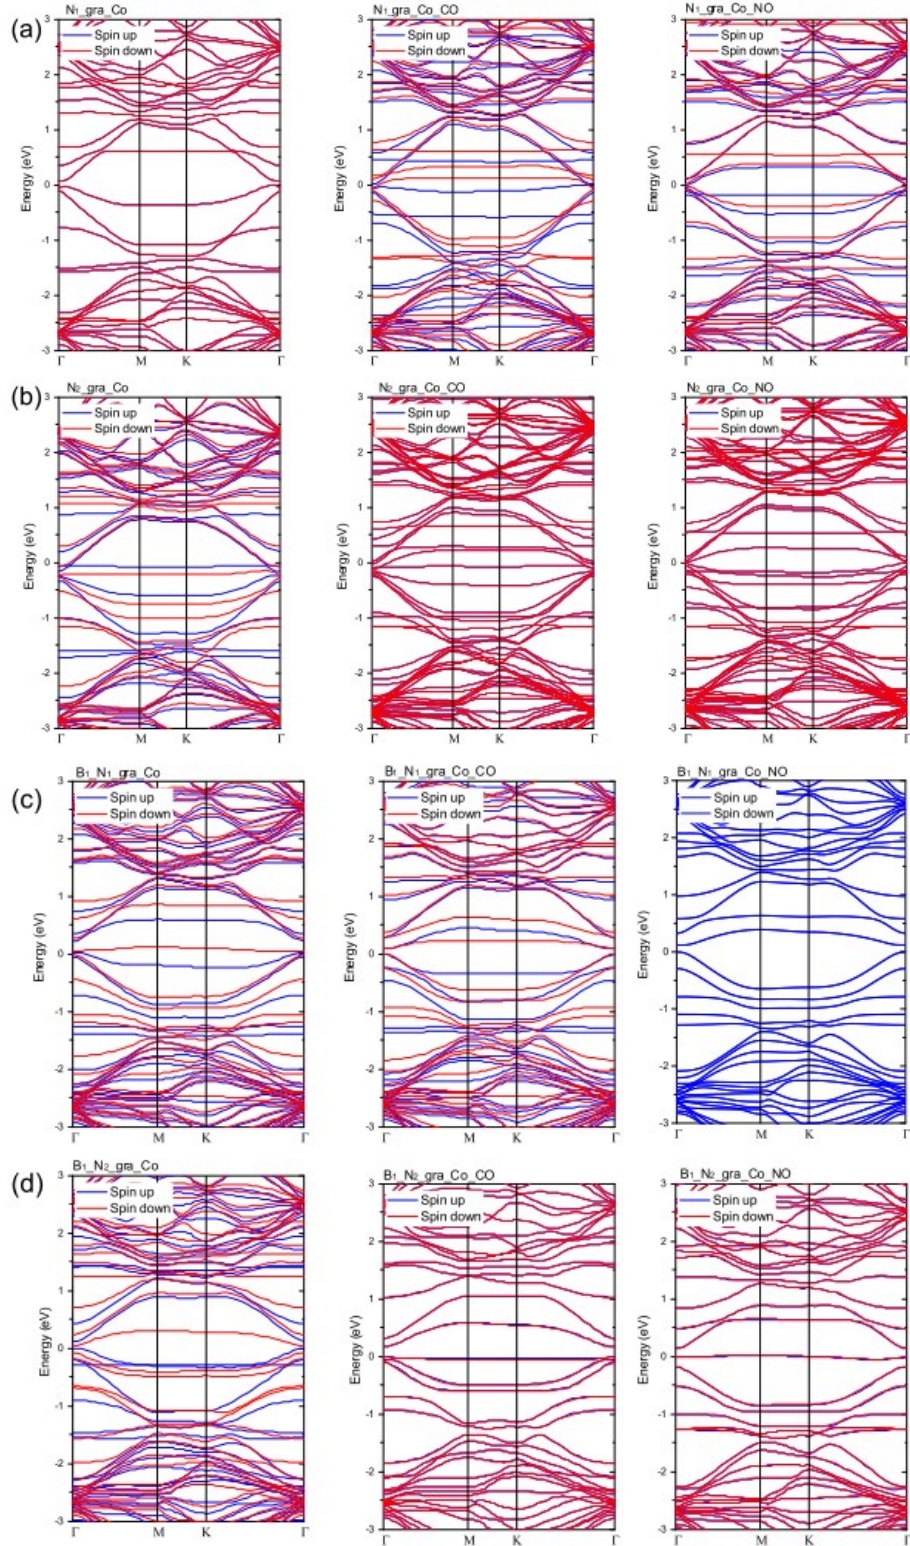

**Fig.S6.** Varied band structures of (a)  $N_1$ -graphene-Co, (b)  $N_2$ -graphene-Co, (c)  $B_1N_1$ -graphene-Co and (d)  $B_1N_2$ -graphene-Co sheets without (or with) CO and NO adsorption.

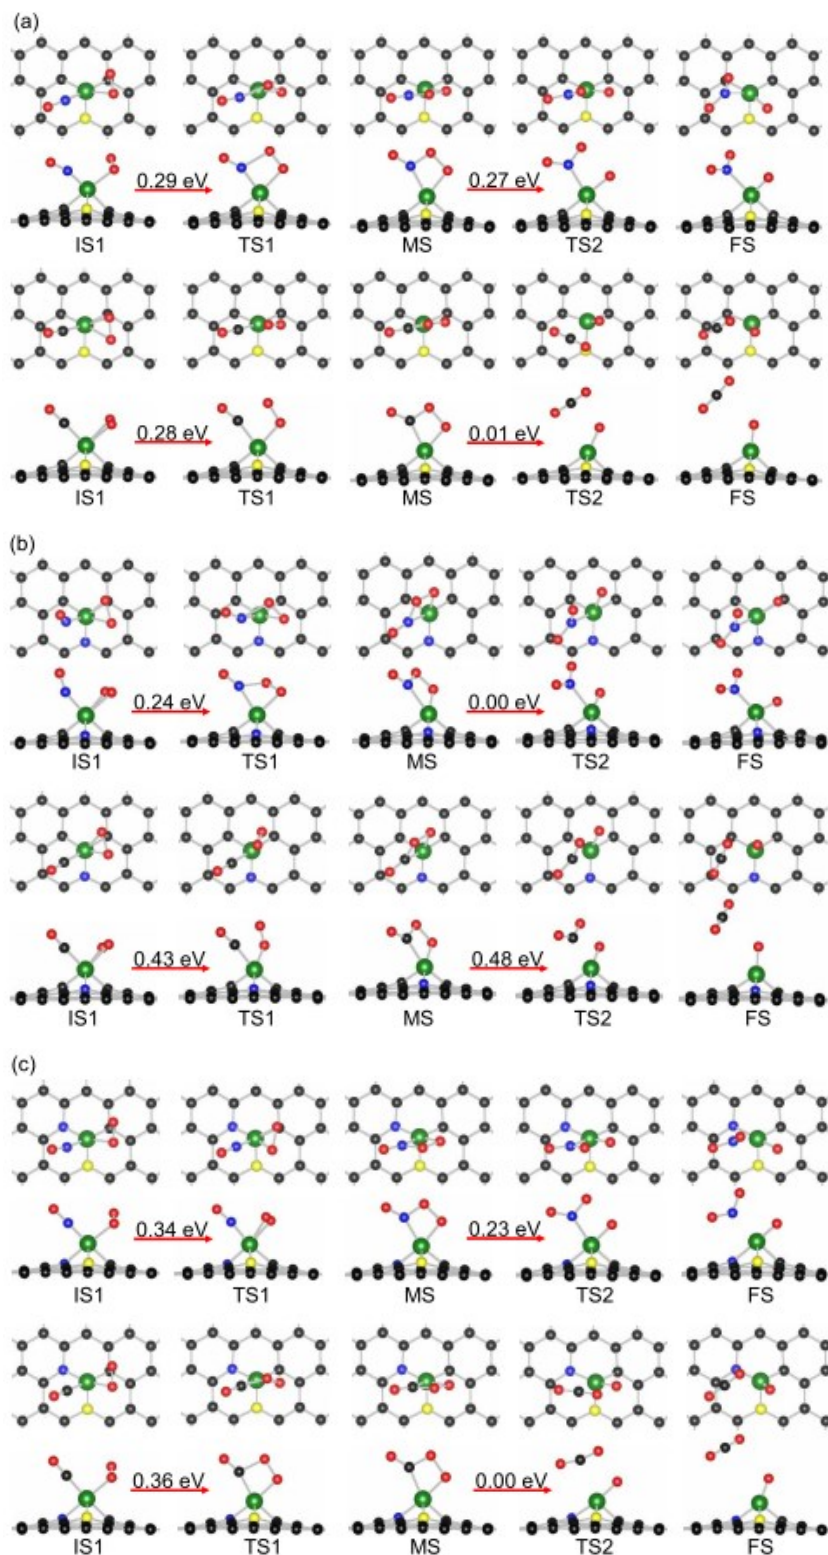

**Fig.S7.** Catalytic reactions for NO and CO oxidation via LH mechanism on (a) B<sub>1</sub>-graphene-Co, (b) N<sub>1</sub>-graphene-Co and (c) B<sub>1</sub>N<sub>1</sub>-graphene-Co sheets. Black, yellow, blue, green and red balls represent C, B, N, Co and O atoms, respectively.
